# Supplementary material for: Assessing Medical Student Readiness to Navigate Language Barriers in Telehealth: Cross-sectional Survey Study
Source: PubMed Central journal article supplement (PMC9412902; doi:10.2196/36096), 2022-08-11
Supplement: mededu_v8i3e36096_app2.pdf [file mededu_v8i3e36096_app2.pdf]

## Multimedia Appendix 2

Table S1:

Telehealth confidence level distributions, sample size, and corresponding statistical testing from Figure 1.

|   | Tasks                                                                        | Not at all confident<br>N (%) | Not confident<br>N (%) | Somewhat confident<br>N (%) | Confident<br>N (%) | Sample Size<br>n (missing) | Wilcoxon signed rank test<br>(test statistic, z-score, p-value) |
|---|------------------------------------------------------------------------------|-------------------------------|------------------------|-----------------------------|--------------------|----------------------------|-----------------------------------------------------------------|
| 1 | LEP: Building a diet & exercise action plan with patient                     | 11 (17.5)                     | 25 (39.7)              | 19 (30.2)                   | 8 (12.7)           | n = 63 (9)                 |                                                                 |
|   | English: Building a diet & exercise action plan with patient                 | 1 (1.6)                       | 3 (4.8)                | 30 (47.7)                   | 29 (46.0)          | n = 63 (9)                 | T=0, z=-6.1, p<0.001                                            |
| 2 | LEP: Empowering patient in lifestyle modifications for managing diabetes     | 12 (19.0)                     | 23 (36.5)              | 21 (33.3)                   | 7 (11.1)           | n = 63 (9)                 |                                                                 |
|   | English: Empowering patient in lifestyle modifications for managing diabetes | 1 (1.6)                       | 3 (4.8)                | 28 (44.4)                   | 31 (49.2)          | n = 63 (9)                 | T=0, z=-6.1, p<0.001                                            |
| 3 | LEP: Eliciting questions & patient preferences for diabetes                  | 11 (17.5)                     | 17 (27.0)              | 28 (44.4)                   | 7 (11.1)           | n = 63 (9)                 |                                                                 |
|   | English: Eliciting questions & patient preferences for diabetes              | 0 (0.0)                       | 3 (4.8)                | 16 (25.4)                   | 44 (69.8)          | n = 63 (9)                 | T=0, z=-6.3, p<0.001                                            |
| 4 | LEP: Understanding patient's beliefs regarding diabetes                      | 10 (15.6)                     | 24 (42.2)              | 22 (34.4)                   | 5 (7.8)            | n = 64 (8)                 |                                                                 |
|   | English: Understanding patient's beliefs regarding diabetes                  | 1 (1.6)                       | 3 (4.7)                | 23 (35.9)                   | 37 (57.8)          | n = 64 (8)                 | T=0, z=-6.3, p<0.001                                            |
| 5 | LEP: Developing trust                                                        | 12 (19.7)                     | 23 (37.7)              | 20 (32.8)                   | 6 (9.8)            | n = 61 (11)                |                                                                 |
|   | English: Developing trust                                                    | 0 (0.0)                       | 7 (11.5)               | 28 (45.9)                   | 26 (42.6)          | n = 61 (11)                | T=0, z=-5.9, p<0.001                                            |
| 6 | LEP: Assessing medication adherence                                          | 10 (15.6)                     | 21 (32.8)              | 21 (32.8)                   | 12 (18.8)          | n = 64 (8)                 |                                                                 |
|   | English: Assessing medication adherence                                      | 0 (0.0)                       | 0 (0.0)                | 25 (39.1)                   | 39 (60.9)          | n = 64 (8)                 | T=0, z=-5.9, p<0.001                                            |
| 7 | LEP: Negotiating visit agenda                                                | 11 (17.2)                     | 17 (26.6)              | 23 (35.9)                   | 13 (20.3)          | n = 64 (8)                 |                                                                 |
|   | English: Negotiating visit agenda                                            | 0 (0.0)                       | 2 (3.1)                | 22 (34.4)                   | 40 (62.5)          | n = 64 (8)                 | T=0, z=-5.7, p<0.001                                            |
| 8 | LEP: Identifying patient's agenda                                            | 7 (10.9)                      | 10 (15.6)              | 24 (37.5)                   | 23 (35.9)          | n = 64 (8)                 |                                                                 |
|   | English: Identifying patient's agenda                                        | 0 (0.0)                       | 0 (0.0)                | 12 (18.8)                   | 52 (81.3)          | n = 64 (8)                 | T=0, z=-5.4, p<0.001                                            |

Table S2:

Confidence levels distributions, sample size, and corresponding statistical testing from Figure 2. Comparing confidence levels when working with patients with LEP during in-person versus telehealth encounters (Figures 1b vs. 2b).

|   | Task                                                             | Not at all confident N (%) | Not confident N (%) | Somewhat confident N (%) | Confident N (%) | Sample Size n (missing) | Wilcoxon signed rank test (test statistic, z-score, p-value) |
|---|------------------------------------------------------------------|----------------------------|---------------------|--------------------------|-----------------|-------------------------|--------------------------------------------------------------|
| 1 | In person: Building a diet & exercise action plan with patient   | 10 (15.6)                  | 21 (32.8)           | 25 (39.1)                | 8 (12.5)        | n = 64 (8)              |                                                              |
|   | Telehealth: Building a diet & exercise action plan with patient  | 12 (18.8)                  | 25 (39.1)           | 19 (29.7)                | 8 (12.5)        | n = 64 (8)              | T=38.0, z=-1.7, p=0.092                                      |
| 2 | In person: Empowering patient in lifestyle modifications for DM  | 11 (17.2)                  | 17 (26.6)           | 28 (43.8)                | 8 (12.5)        | n = 64 (8)              |                                                              |
|   | Telehealth: Empowering patient in lifestyle modifications for DM | 13 (20.3)                  | 23 (35.9)           | 21 (32.8)                | 7 (10.9)        | n = 64 (8)              | T=55.0, z=-2.0, p=0.044                                      |
| 3 | In person: Eliciting questions & patient preferences for DM      | 10 (15.6)                  | 11 (17.2)           | 32 (50.0)                | 11 (17.2)       | n = 64 (8)              |                                                              |
|   | Telehealth: Eliciting questions & patient preferences for DM     | 12 (18.8)                  | 17 (26.6)           | 28 (43.8)                | 7 (10.9)        | n = 64 (8)              | T=48.5, z=-2.5, p=0.012                                      |
| 4 | In person: Understanding patient's beliefs regarding DM          | 11 (17.2)                  | 17 (26.6)           | 30 (46.9)                | 6 (9.4)         | n = 64 (8)              |                                                              |
|   | Telehealth: Understanding patient's beliefs regarding DM         | 10 (15.6)                  | 27 (42.2)           | 22 (34.4)                | 5 (7.8)         | n = 64 (8)              | T=36.0, z=-1.8, p=0.077                                      |
| 5 | In person: Developing trust                                      | 9 (14.8)                   | 12 (19.7)           | 30 (49.2)                | 10 (16.4)       | n = 61 (11)             |                                                              |
|   | Telehealth: Developing trust                                     | 12 (19.7)                  | 23 (37.7)           | 20 (32.8)                | 6 (9.8)         | n = 61 (11)             | T=48.0, z=-3.5, p<0.001                                      |
| 6 | In person: Assessing medication adherence                        | 8 (12.5)                   | 14 (21.9)           | 30 (46.8)                | 12 (18.8)       | n = 64 (8)              |                                                              |
|   | Telehealth: Assessing medication adherence                       | 10 (15.6)                  | 21 (32.8)           | 21 (32.8)                | 12 (18.8)       | n = 64 (8)              | T=71.0, z=-2.0, p=0.051                                      |
| 7 | In person: Negotiating visit agenda                              | 11 (17.2)                  | 9 (14.1)            | 32 (50.0)                | 12 (18.8)       | n = 64 (8)              |                                                              |
|   | Telehealth: Negotiating visit agenda                             | 11 (17.2)                  | 17 (26.6)           | 23 (35.9)                | 13 (20.3)       | n = 64 (8)              | T=54.0, z=-1.5, p=0.127                                      |
| 8 | In person: Identifying patient's agenda                          | 5 (7.8)                    | 6 (9.4)             | 22 (34.4)                | 31 (48.4)       | n = 64 (8)              |                                                              |
|   | Telehealth: Identifying patient's agenda                         | 7 (10.9)                   | 10 (15.6)           | 24 (37.5)                | 23 (35.9)       | n = 64 (8)              | T=53.5, z=-2.8, p=0.005                                      |

Table S3:

Self-reported relative frequency, sample size, and corresponding statistical testing from Table 3.

|   | <b>Task</b>                                              | <b>Less often with LEP patients</b><br>N (%) | <b>Equally or more likely with LEP patients</b><br>N (%) | <b>Sample size n (missing)</b> | <b>Chi-squared test</b><br>$X^2(df) = \text{test statistic, p-value}$ |
|---|----------------------------------------------------------|----------------------------------------------|----------------------------------------------------------|--------------------------------|-----------------------------------------------------------------------|
| 1 | Telehealth: Perform teach back                           | 31 (53.4)                                    | 27 (46.6)                                                | n = 58 (14)                    |                                                                       |
|   | In person: Perform teach back                            | 30 (51.7)                                    | 28 (48.3)                                                | n = 58 (14)                    | $X^2(1) = 0.03, p=0.85$                                               |
| 2 | Telehealth: Make a personal connection                   | 27 (45.8)                                    | 32 (54.2)                                                | n = 59 (13)                    |                                                                       |
|   | In person: Make a personal connection                    | 26 (44.1)                                    | 33 (55.9)                                                | n = 59 (13)                    | $X^2(1) = 0.03, p=0.85$                                               |
| 3 | Telehealth: Determine beliefs about diagnosis and workup | 24 (40.7)                                    | 35 (59.3)                                                | n = 59 (13)                    |                                                                       |
|   | In person: Determine beliefs about diagnosis and workup  | 24 (40.7)                                    | 35 (59.3)                                                | n = 59 (13)                    | $X^2(1) = 0.0, p=1.0$                                                 |
| 4 | Telehealth: Discuss details of social history            | 29 (49.2)                                    | 30 (50.8)                                                | n = 59 (13)                    |                                                                       |
|   | In person: Discuss details of social history             | 26 (44.1)                                    | 33 (55.9)                                                | n = 59 (13)                    | $X^2(1) = 0.31, p=0.58$                                               |
| 5 | Telehealth: Asking about patients' non-medical interests | 39 (66.1)                                    | 20 (33.9)                                                | n = 59 (13)                    |                                                                       |
|   | In person: Asking about patients' non-medical interests  | 46 (78.0)                                    | 13 (22.0)                                                | n = 59 (13)                    | $X^2(1) = 2.06, p=0.15$                                               |
